# Supplementary material
Source: PubMed Central journal article supplement (PMC3486558)
Supplement: AAC.01411-12_zac999101361so2.pdf [file AAC.01411-12_zac999101361so2.pdf]

**Table S1: Data collection and refinement statistics for the *S. aureus* FabI, 3’NADPH , AFN-1252 ternary complex**

|                                                                                                         |                           |
|---------------------------------------------------------------------------------------------------------|---------------------------|
| <b>Data collection</b>                                                                                  |                           |
| Space Group                                                                                             | I4122                     |
| No. of molecules in AU                                                                                  | 1                         |
| Resolution (Å)                                                                                          | 50.0 - 1.80 (1.85 - 1.80) |
| a, b, c (Å)                                                                                             | a = b = 126.3, c = 80.9   |
| $\alpha$ , $\beta$ , $\gamma$ (°)                                                                       | 90, 90, 90                |
| Unique data                                                                                             | 30598 (3003)              |
| Completeness                                                                                            | 100 (99.9)                |
| Average redundancy                                                                                      | 9.7 (4.5)                 |
| $R_{\text{sym}}$                                                                                        | 9.6 (52.9)                |
| $\langle I/\sigma(I) \rangle$                                                                           | 38.8 (3.4)                |
| <b>Refinement statistics</b>                                                                            |                           |
| R-factor <sup>a</sup>                                                                                   | 16.9                      |
| $R_{\text{free}}$                                                                                       | 20.2                      |
| Average main chain / side chain B-factor (Å <sup>2</sup> )                                              | 21.0                      |
| Average solvent / 3’NADPH / AFN-1252 B-factor (Å <sup>2</sup> )                                         | 36.3 / 22.2 / 23.5        |
| Covalent bond lengths (Å)                                                                               | 0.013                     |
| Bond angles (°)                                                                                         | 1.702                     |
| <sup>a</sup> R-factor – $\sum  hkl   F_{\text{obs}}  -  F_{\text{calc}}  / \sum  hkl   F_{\text{obs}} $ |                           |

**Table S2. Oligonucleotide primers used for polymerase chain amplification and sequencing of *S. aureus* and *S. epidermidis* FabI genes.**

| Name of Primer                   | Sequence 5'→ 3'        |
|----------------------------------|------------------------|
| <i>S. aureus</i> FABI FOR 1      | CCCATTCGGAGGAGACATCA   |
| <i>S. aureus</i> FABI FOR 2      | GGGAATCGCTAATAAGCGTAGT |
| <i>S. aureus</i> FABI FOR 3      | GCATTAGACTTAGGTCCTGA   |
| <i>S. aureus</i> FABI REV 1      | CCTTCAAGTTGGTGTGCAAT   |
| <i>S. aureus</i> FABI REV 2      | CAAGTGGCGTTACAGGTGAA   |
| <i>S. aureus</i> FABI REV 3      | GATGTTGGCAATATTGATGGTG |
| <i>S. epidermidis</i> FABI FOR 1 | CCCAGTTGGTGTGTTGAAG    |
| <i>S. epidermidis</i> FABI FOR 2 | GCGAATAAACGTAGTATCGCA  |
| <i>S. epidermidis</i> FABI FOR 3 | AGCAAGTTTAGAGGCGAATG   |
| <i>S. epidermidis</i> FABI REV 1 | CTGCAACAAGAATGAGTGTG   |
| <i>S. epidermidis</i> FABI REV 2 | GTGATCTTTCAAGTGGTGTAAC |
| <i>S. epidermidis</i> FABI REV 3 | GTAGGCCAGATTGATGGTGT   |
